# Supplementary material for: Comparison of the 7th and the 8th AJCC Staging System for Non-metastatic D2-Resected Lymph Node–Positive Gastric Cancer Treated with Different Adjuvant Protocols
Source: PubMed Central journal article supplement — Cancer Res Treat. 2018 Oct 1;51(3):876–85. doi: 10.4143/crt.2018.401 (PMC6639239; doi:10.4143/crt.2018.401), 2018-10-01
Supplement: crt-2018-401-suppl2.pdf [file crt-2018-401-suppl2.pdf]

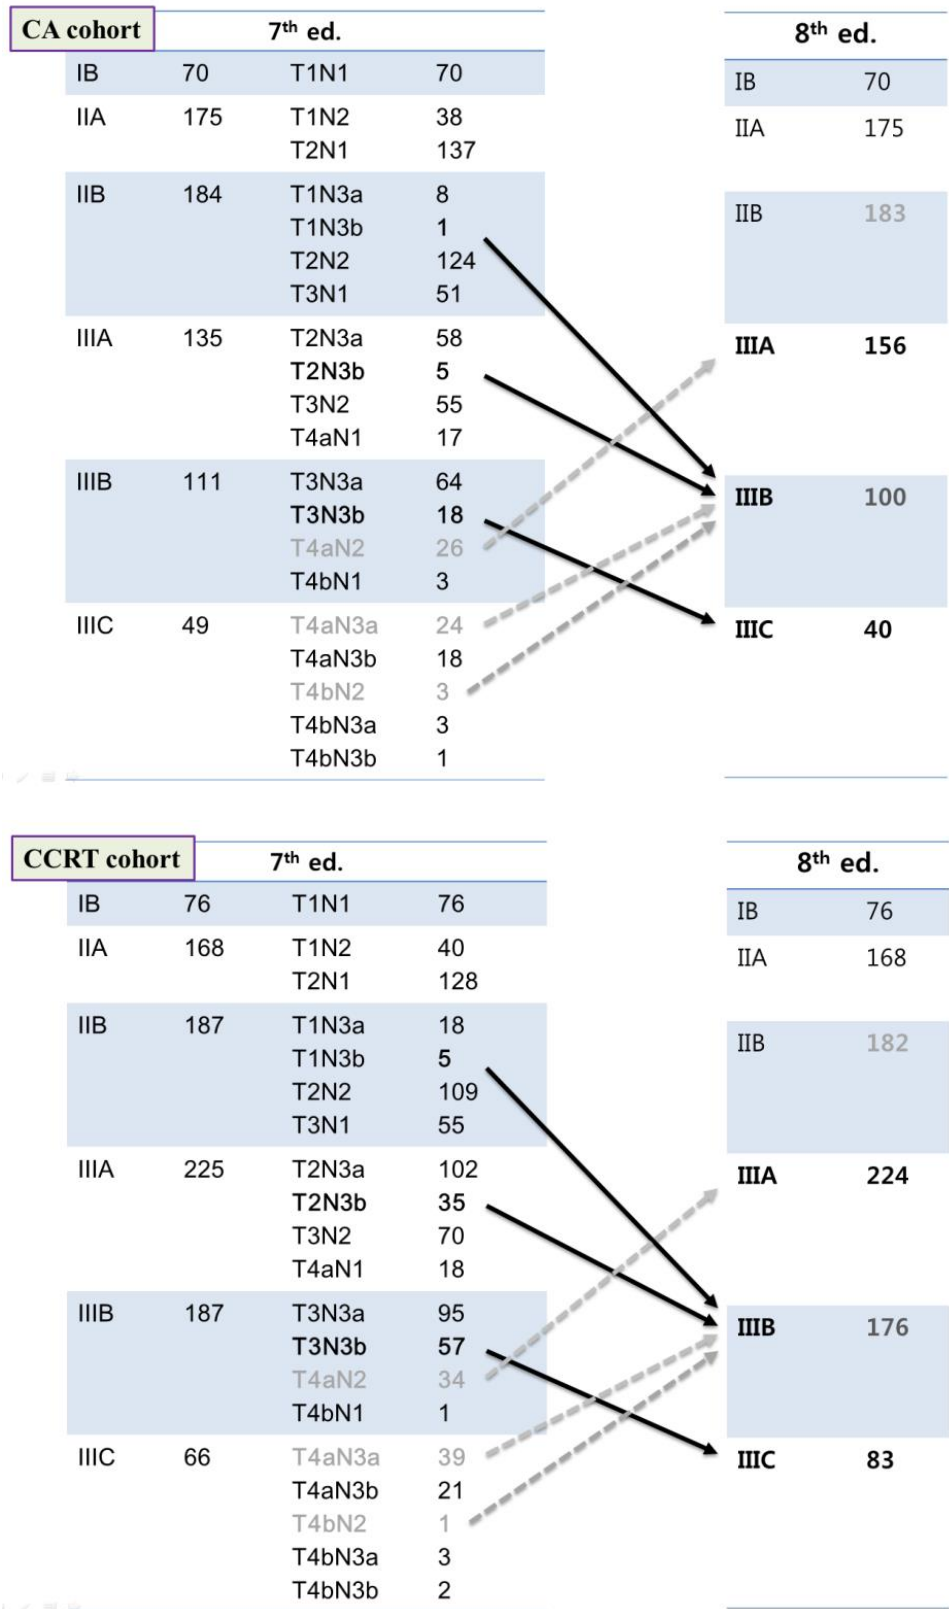

**S2 Fig.** Outcomes of stage redistribution by the 7th and the 8th American Joint Committee on Cancer staging system for enrolled patients according to adjuvant treatment (chemotherapy alone [CA] cohort and concurrent chemoradiotherapy [CCRT] cohort).
