# Supplementary material for: Comparison of the 7th and the 8th AJCC Staging System for Non-metastatic D2-Resected Lymph Node–Positive Gastric Cancer Treated with Different Adjuvant Protocols
Source: PubMed Central journal article supplement — Cancer Res Treat. 2018 Oct 1;51(3):876–85. doi: 10.4143/crt.2018.401 (PMC6639239; doi:10.4143/crt.2018.401), 2018-10-01
Supplement: crt-2018-401-suppl3.pdf [file crt-2018-401-suppl3.pdf]

**S3 Table.** Comparison of crude death rate prediction between the 7th and the 8th edition of AJCC staging system

| Group | System | Stage | No. of patient s | Death, n (%) |                            | HR   | 95% CI     | p-value |
|-------|--------|-------|------------------|--------------|----------------------------|------|------------|---------|
| All   | 7th    | IB    | 146              | 6 (4.1)      |                            |      |            | <0.001  |
|       |        | IIA   | 343              | 38 (11.1)    | IB <sup>a</sup> vs. IIA    | 2.71 | 1.15-6.41  | 0.02    |
|       |        | IIB   | 371              | 63 (17.0)    | IIA <sup>a</sup> vs. IIB   | 1.66 | 1.11-2.49  | 0.01    |
|       |        | IIIA  | 360              | 103 (28.6)   | IIB <sup>a</sup> vs. IIIA  | 1.80 | 1.32-2.46  | <0.001  |
|       |        | IIIB  | 298              | 135 (45.3)   | IIIA <sup>a</sup> vs. IIIB | 1.95 | 1.51-2.52  | <0.001  |
|       |        | IIIC  | 115              | 59 (51.3)    | IIIB <sup>a</sup> vs. IIIC | 1.32 | 0.97-1.879 | 0.08    |
|       | 8th    | IB    | 146              | 6 (4.1)      |                            |      |            | <0.001  |
|       |        | IIA   | 343              | 38 (11.1)    | IB <sup>a</sup> vs. IIA    | 2.71 | 1.15-6.42  | 0.02    |
|       |        | IIB   | 365              | 61 (16.7)    | IIA <sup>a</sup> vs. IIB   | 1.63 | 1.09-2.44  | 0.02    |
|       |        | IIIA  | 380              | 109 (28.7)   | IIB <sup>a</sup> vs. IIIA  | 1.88 | 1.37-2.57  | <0.001  |
|       |        | IIIB  | 276              | 117 (42.4)   | IIIA <sup>a</sup> vs. IIIB | 1.69 | 1.30-2.20  | <0.001  |
|       |        | IIIC  | 123              | 73 (59.3)    | IIIB <sup>a</sup> vs. IIIC | 1.87 | 1.40-2.51  | <0.001  |
| CA    | 7th    | IB    | 70               | 4 (5.7)      |                            |      |            | <0.001  |
|       |        | IIA   | 175              | 20 (11.4)    | IB <sup>a</sup> vs. IIA    | 2.01 | 0.69-5.87  | 0.20    |
|       |        | IIB   | 184              | 35 (19.0)    | IIA <sup>a</sup> vs. IIB   | 1.85 | 1.07-3.20  | 0.03    |
|       |        | IIIA  | 135              | 38 (28.1)    | IIB <sup>a</sup> vs. IIIA  | 1.55 | 0.98-2.45  | 0.06    |
|       |        | IIIB  | 111              | 43 (38.7)    | IIIA <sup>a</sup> vs. IIIB | 1.61 | 1.04-2.49  | 0.03    |
|       |        | IIIC  | 49               | 25 (51.0)    | IIIB <sup>a</sup> vs. IIIC | 1.52 | 0.99-2.66  | 0.06    |
|       | 8th    | IB    | 70               | 4 (5.7)      |                            |      |            | <0.001  |
|       |        | IIA   | 175              | 20 (11.4)    | IB <sup>a</sup> vs. IIA    | 2.01 | 0.69-5.87  | 0.20    |
|       |        | IIB   | 183              | 34 (18.6)    | IIA <sup>a</sup> vs. IIB   | 1.80 | 1.03-3.12  | 0.04    |
|       |        | IIIA  | 156              | 44 (28.2)    | IIB <sup>a</sup> vs. IIIA  | 1.63 | 1.04-2.55  | 0.03    |
|       |        | IIIB  | 100              | 38 (38.0)    | IIIA <sup>a</sup> vs. IIIB | 1.49 | 0.96-2.30  | 0.07    |
|       |        | IIIC  | 40               | 25 (62.5)    | IIIB <sup>a</sup> vs. IIIC | 2.43 | 1.47-4.04  | <0.001  |
| CCRT  | 7th    | IB    | 76               | 2 (2.6)      |                            |      |            | <0.001  |
|       |        | IIA   | 168              | 18 (10.7)    | IB <sup>a</sup> vs. IIA    | 4.06 | 0.94-17.51 | 0.06    |
|       |        | IIB   | 187              | 28 (15.0)    | IIA <sup>a</sup> vs. IIB   | 1.50 | 0.83-2.72  | 0.18    |
|       |        | IIIA  | 225              | 65 (28.9)    | IIB <sup>a</sup> vs. IIIA  | 2.11 | 1.35-3.28  | 0.001   |
|       |        | IIIB  | 187              | 92 (49.2)    | IIIA <sup>a</sup> vs. IIIB | 2.15 | 1.56-2.96  | <0.001  |
|       |        | IIIC  | 66               | 34 (51.5)    | IIIB <sup>a</sup> vs. IIIC | 1.18 | 0.79-1.74  | 0.42    |
|       | 8th    | IB    | 76               | 2 (2.6)      |                            |      |            | <0.001  |
|       |        | IIA   | 168              | 18 (10.7)    | IB <sup>a</sup> vs. IIA    | 4.06 | 0.94-17.48 | 0.06    |
|       |        | IIB   | 182              | 27 (14.8)    | IIA <sup>a</sup> vs. IIB   | 1.48 | 0.82-2.69  | 0.20    |
|       |        | IIIA  | 224              | 65 (29.0)    | IIB <sup>a</sup> vs. IIIA  | 2.16 | 1.38-3.39  | <0.001  |
|       |        | IIIB  | 176              | 79 (44.9)    | IIIA <sup>a</sup> vs. IIIB | 1.83 | 1.32-2.54  | <0.001  |
|       |        | IIIC  | 83               | 48 (57.8)    | IIIB <sup>a</sup> vs. IIIC | 1.63 | 1.42-2.33  | 0.008   |

AJCC, American Joint Committee on Cancer; HR, hazard ratio; CI, confidence interval. <sup>a</sup>Reference.
